# Supplementary material for: Hydrogen evolution of a MoS2/AOCF electrocatalyst doped with Ni element
Source: Royal Society of Chemistry journal article supplement (doi:10.1039/d0nj05833e), 2021-01-01
Supplement: d0nj05833e1.pdf [file d0nj05833e1.pdf]

## Supporting Information

### Hydrogen evolution of MoS<sub>2</sub>/AOCF electrocatalyst doped with Ni element

Tingxian Tao, Xiaohan Lu, Mingxing Qin, Liru Chen, Wei Gao, Siyu Lu, and Zhichuan Wu\*

*Anhui Laboratory of Functional Coordinated Complexes for Materials Chemistry and Application,*

*Anhui Polytechnic University, Beijing Middle Road, Wuhu 241000, China.*

**Journal:** New Journal of Chemistry

**Synthesis of AOCF:** 5 g polyacrylonitrile fiber (PAN) was added to a mixed solution of hydroxylamine hydrochloride and sodium carbonate prepared in a certain proportion, stirred in a water bath at 65 °C for 2 hours, then washing with DI water to pH=7, and finally dried naturally to obtain amidoxime fiber (AOCF).

**Synthesis of MoS<sub>2</sub>:** Na<sub>2</sub>MoO<sub>4</sub>·2H<sub>2</sub>O (0.242 g) and CH<sub>3</sub>CSNH<sub>2</sub> (0.751 g) were intermittently dissolved in 30 mL DMSO. After being stirring for 2 hours to form homogeneous solution, the mixture was transferred into the Teflon-lined autoclave of 40 mL, and heated at 180 °C for 13 h. The resultant product was collected by centrifugation, washed with DI water and anhydrous ethanol several times. Finally, the obtained sample was dried 12 hours for 65 °C.

**Synthesis of Ni@MoS<sub>2</sub>:** Na<sub>2</sub>MoO<sub>4</sub>·2H<sub>2</sub>O (0.242 g), CH<sub>3</sub>CSNH<sub>2</sub> (0.751 g) and NiCl<sub>2</sub>·6H<sub>2</sub>O (0.012 g) were intermittently dissolved in 30 mL DMSO. After being stirring for 2 hours to form homogeneous solution, the mixture was transferred into the Teflon-lined autoclave of 40 mL, and heated at 180 °C for 13 h. The resultant product was collected by centrifugation, washed with DI water and anhydrous ethanol several times. Finally, the obtained sample was dried 12 hours for 65 °C.

**Synthesis of MoS<sub>2</sub>/AOCF:** Firstly, AOCF (3 g) were added to dimethyl sulfoxide (DMSO) and stirred at 70 °C for 24 h and then rested at room temperature for 24 h. Na<sub>2</sub>MoO<sub>4</sub>·2H<sub>2</sub>O (0.242 g) and CH<sub>3</sub>CSNH<sub>2</sub> (0.751 g) were intermittently dissolved in 30 mL of the above solution. After being stirring for 2 hours to form homogeneous solution, the mixture was transferred into the Teflon-lined autoclave of 40 mL, and heated at 180 °C for 13 h.

**Synthesis of MoS<sub>2</sub>/PAN:** Firstly, PAN (3 g) were added to dimethyl sulfoxide (DMSO) and stirred at 70 °C for 24 h and then rested at room temperature for 24 h. Na<sub>2</sub>MoO<sub>4</sub>·2H<sub>2</sub>O (0.242 g) and CH<sub>3</sub>CSNH<sub>2</sub> (0.751 g) were intermittently dissolved in 30 mL of the above solution. After being stirring for 2 hours to form homogeneous

solution, the mixture was transferred into the Teflon-lined autoclave of 40 mL, and heated at 180 °C for 13 h.

**Synthesis of Ni@MoS<sub>2</sub>/PAN:** Firstly, PAN (3 g) were added to dimethyl sulfoxide (DMSO) and stirred at 70 °C for 24 h and then rested at room temperature for 24 h. Na<sub>2</sub>MoO<sub>4</sub>·2H<sub>2</sub>O (0.242 g), CH<sub>3</sub>CSNH<sub>2</sub> (0.751 g) and NiCl<sub>2</sub>·6H<sub>2</sub>O (0.012 g) were intermittently dissolved in 30 mL of the above solution. After being stirring for 2 hours to form homogeneous solution, the mixture was transferred into the Teflon-lined autoclave of 40 mL, and heated at 180 °C for 13 h.

**Table S1.** Comparison of the electrocatalytic HER performance of MoS<sub>2</sub>-based electrocatalysts in acidic solution.

| Catalysts                                                              | $\eta_{10}$ (mV) | Tafel slope (mV/dec) | $C_{dl}$ (mF/cm <sup>2</sup> ) | Ref.      |
|------------------------------------------------------------------------|------------------|----------------------|--------------------------------|-----------|
| Ni@MoS <sub>2</sub> /AOCF                                              | 173              | 54.80                | 58.97                          | This work |
| Pt-MoS <sub>2</sub>                                                    | 151              | 96                   | -                              | 1         |
| Al-MoS <sub>2</sub>                                                    | 248              | 82                   | 19.1                           | 2         |
| Zn@MoS <sub>2-x</sub>                                                  | 194              | 73                   | 2.07                           | 3         |
| g-C <sub>3</sub> N <sub>4</sub> /30%FeS <sub>2</sub> /MoS <sub>2</sub> | 193              | 87.7                 | 20.9                           | 4         |
| Defective MoS <sub>2</sub> nanoflakes                                  | 214              | 52                   | 10.8                           | 5         |
| N-C@P-MoS <sub>2</sub>                                                 | 188              | 68                   | 8.31                           | 6         |
| MCM@MoS <sub>2</sub> -Ni                                               | 161              | 81                   | 4.8                            | 7         |
| MoS <sub>2</sub> -polymer carbon nanodot                               | 290              | 80                   | 43.5                           | 8         |
| V-MoS <sub>2</sub>                                                     | 146              | 48                   | 26.1                           | 9         |
| MoS <sub>2</sub> @RGO/MMT                                              | 233              | 53                   | 9.83                           | 10        |
| MoS <sub>2</sub> -cPAN                                                 | 185              | 68                   | -                              | 11        |

## References

- [1] J. Deng, H. Li, J. Xiao, Y. Tu, D. Deng, H. Yang, H. Tian, J. Li, P. Ren and X. Bao, *Energy & Environmental Science*, 2015, 8, 1594-1601.
- [2] J. Jian, Y. Li, H. Bi, X. Wang, X. Wu and W. Qin, *Acs Sustainable Chemistry & Engineering*, 2020, 8, 4547-4554.

- [3] W. Wu, C. Niu, C. Wei, Y. Jia, C. Li and Q. Xu, *Angewandte Chemie International Edition*, 2019, 58, 2029-2033.
- [4] Y. Li, S. Zhu, Y. Xu, R. Ge, J. Qu, M. Zhu, Y. Liu, J. M. Cairney, R. Zheng, S. Li, J. Zhang and W. Li, *Chemical Engineering Journal*, 2020, DOI: <https://doi.org/10.1016/j.cej.2020.127804>, 127804.
- [5] K. Nguyen-Ba, J. R. Vargas-García and A. Manzo-Robledo, *Materials Science and Engineering: B*, 2020, 256, 114539.
- [6] Y. Wei, X. Zhang, Z. Zhao, H.-S. Chen, K. Matras-Postolek, B. Wang and P. Yang, *Electrochimica Acta*, 2019, 297, 553-563.
- [7] H. B. Zhang, L. Yu, T. Chen, W. Zhou and X. W. Lou, *Adv. Funct. Mater.*, 2018, 28, 8.
- [8] A. Kagkoura, R. Canton - Vitoria, L. Vallan, J. Hernandez - Ferrer, A. M. Benito, W. K. Maser, R. Arenal and N. J. C. A. E. J. Tagmatarchis, 2020, 26.
- [9] T. Liu, C. Fang, B. Yu, Y. You, H. Niu, R. Zhou, J. Zhang and J. Xu, *Inorg. Chem. Front.*, 2020, 7, 2497-2505.
- [10] C. B. Ma, X. Qi, B. Chen, S. Bao, Z. Yin, X.-J. Wu, Z. Luo, J. Wei, H.-L. Zhang and H. Zhang, *Nanoscale*, 2014, 6, 5624–5629.
- [11] T. S. Zeleke, M.-C. Tsai, M. A. Weret, C.-J. Huang, M. K. Birhanu, T.-C. Liu, C.-P. Huang, Y.-L. Soo, Y.-W. Yang, W.-N. Su and B.-J. Hwang, *ACS Nano*, 2019, 13, 6720-6729.

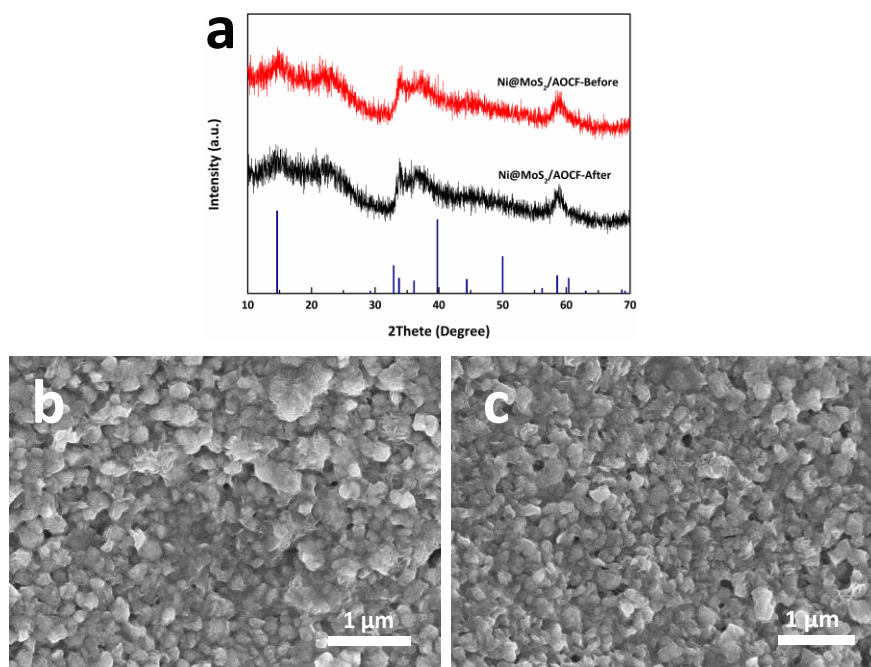

**Figure S1.** (a) XRD patterns of Ni@MoS<sub>2</sub>/AOCF before and after Chronopotentiometry test under a current density of 10 mA/cm<sup>2</sup> for 36000s; SEM images of Ni@MoS<sub>2</sub>/AOCF before (b) and after (c) Chronopotentiometry test under a current density of 10 mA/cm<sup>2</sup> for 36000s.

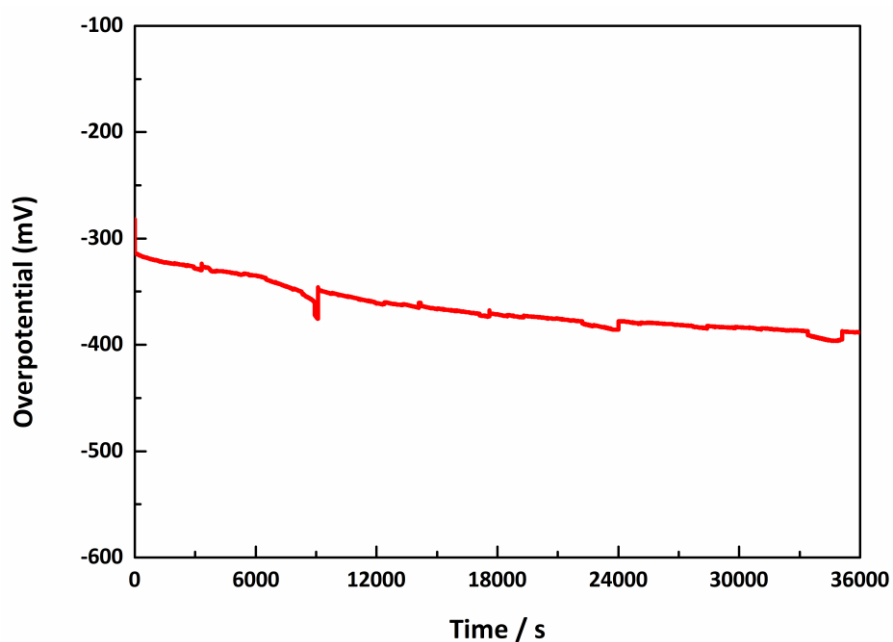

**Figure S2.** Chronopotentiometry test of Ni@MoS<sub>2</sub>/PAN under a current density of 10 mA/cm<sup>2</sup> for 36000s;

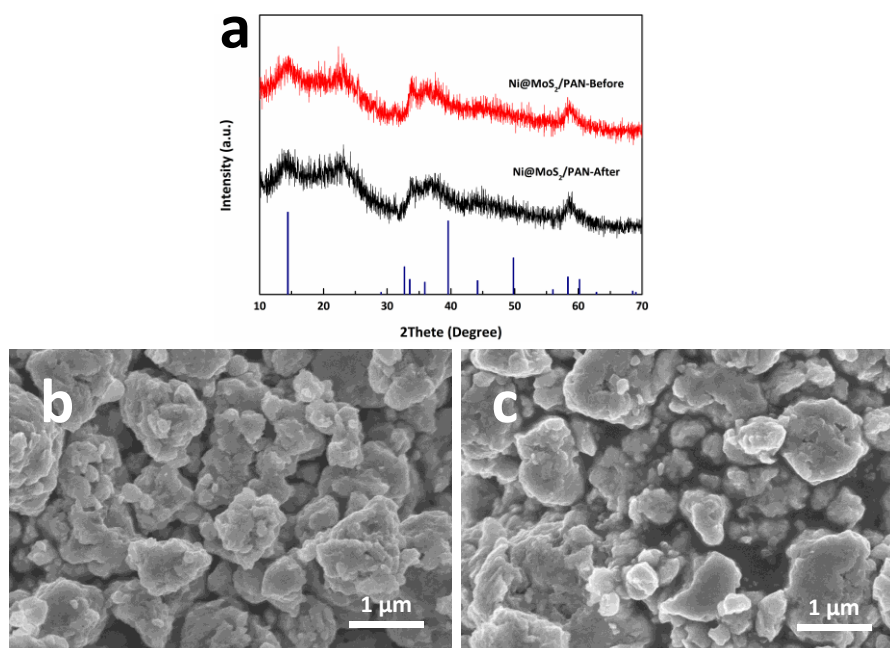

**Figure S3.** (a) XRD patterns of Ni@MoS<sub>2</sub>/PAN before and after Chronopotentiometry test under a current density of 10 mA/cm<sup>2</sup> for 36000s; SEM images of Ni@MoS<sub>2</sub>/PAN before (b) and after (c) Chronopotentiometry test under a current density of 10 mA/cm<sup>2</sup> for 36000s.
